# Supplementary material for: Evaluation of a Highly Efficient DNA Extraction Method for Bacillus anthracis Endospores
Source: Microorganisms. 2020 May 20;8(5):763. doi: 10.3390/microorganisms8050763 (PMC7285266; doi:10.3390/microorganisms8050763)
Supplement: Supplementary file 1 [file microorganisms-08-00763-s001.pdf]

## Supplementary Materials

**Table S1. DNA extraction efficiencies and qualities vary depending on the DNA extraction kit.**

Average DNA yields, qPCR amplification results and ratios 260/280 and 260/230 of samples containing *B. anthracis* or *F. tularensis* cells, obtained using 20 different DNA extraction kits. DNA concentration was determined by Qubit 3.0 fluorometer and the quality of extracted DNA was determined using a NanoDrop spectrophotometer. All tests were performed at least in triplicate. The results are expressed as the mean  $\pm$  standard deviation.

| No. | Commercial kit                                   | DNA yield [ng] | <i>dhp61</i> [C <sub>t</sub> values] | FraTul [C <sub>t</sub> values] | Purity [A260/280] | Purity [A260/230]  |
|-----|--------------------------------------------------|----------------|--------------------------------------|--------------------------------|-------------------|--------------------|
| 1   | MasterPure Complete DNA & RNA Purification kit   | 1001 $\pm$ 168 | 16.46 $\pm$ 0.28                     | 12.76 $\pm$ 0.22               | 2.03 $\pm$ 0.05   | 1.97 $\pm$ 0.10    |
| 2   | In-house protocol, based on DNA Investigator kit | 683 $\pm$ 132  | 16.55 $\pm$ 0.02                     | 13.17 $\pm$ 0.15               | 2.05 $\pm$ 0.16   | 0.16 $\pm$ 0.15    |
| 3   | innu PREP DNA Mini kit                           | 605 $\pm$ 19   | 19.57 $\pm$ 0.11                     | 15.45 $\pm$ 0.11               | 1.41 $\pm$ 0.29   | -1.10 $\pm$ 2.30   |
| 4   | GenElute Bacterial Genomic DNA kit               | 572 $\pm$ 29   | 18.89 $\pm$ 0.24                     | 15.40 $\pm$ 0.39               | 2.12 $\pm$ 0.11   | 1.01 $\pm$ 0.05    |
| 5   | DNeasy Ultra Clean Microbial kit                 | 537 $\pm$ 38   | 16.61 $\pm$ 0.19                     | 13.49 $\pm$ 0.33               | 1.90 $\pm$ 0.02   | -28.83 $\pm$ 28.49 |
| 6   | QIAamp DNA Mini kit                              | 489 $\pm$ 69   | 17.72 $\pm$ 0.09                     | 14.51 $\pm$ 0.35               | 2.14 $\pm$ 0.02   | 1.25 $\pm$ 0.06    |
| 7   | NucleoSpin Microbial DNA Mini kit                | 481 $\pm$ 99   | 17.50 $\pm$ 0.26                     | 15.08 $\pm$ 0.23               | 1.61 $\pm$ 0.07   | -0.41 $\pm$ 0.10   |
| 8   | DNeasy Blood and Tissue kit                      | 477 $\pm$ 79   | 18.85 $\pm$ 0.12                     | 16.28 $\pm$ 0.09               | 1.68 $\pm$ 0.06   | -0.47 $\pm$ 0.11   |
| 9   | MagJet Genomic DNA kit                           | 428 $\pm$ 98   | 17.54 $\pm$ 0.31                     | 14.88 $\pm$ 0.31               | 1.94 $\pm$ 0.06   | -21.43 $\pm$ 12.65 |
| 10  | PureLink Microbiome DNA Purification kit         | 401 $\pm$ 62   | 18.09 $\pm$ 0.27                     | 15.12 $\pm$ 0.44               | 1.91 $\pm$ 0.06   | -0.73 $\pm$ 4.97   |
| 11  | Wizard Genomic DNA Purification kit              | 371 $\pm$ 51   | 17.64 $\pm$ 0.12                     | 14.48 $\pm$ 0.02               | 1.65 $\pm$ 0.08   | 1.45 $\pm$ 0.02    |
| 12  | QIAamp Cador pathogen Mini kit                   | 204 $\pm$ 118  | 20.03 $\pm$ 1.02                     | 16.37 $\pm$ 1.82               | 2.08 $\pm$ 0.11   | 0.09 $\pm$ 0.02    |
| 13  | DNA MiniPrep kit                                 | 199 $\pm$ 200  | 23.82 $\pm$ 9.73                     | 21.93 $\pm$ 10.15              | 1.40 $\pm$ 0.48   | -8.22 $\pm$ 14.05  |
| 14  | DNeasy PowerSoil kit                             | 196 $\pm$ 31   | 19.53 $\pm$ 0.26                     | 15.65 $\pm$ 0.16               | 1.34 $\pm$ 0.02   | -0.19 $\pm$ 0.04   |
| 15  | nexttec 1-step DNA isolation kit for Bacteria    | 187 $\pm$ 19   | 20.54 $\pm$ 0.23                     | 16.30 $\pm$ 0.22               | 1.27 $\pm$ 0.07   | 0.43 $\pm$ 0.03    |
| 16  | QIAamp UCP Pathogen Mini kit                     | 184 $\pm$ 25   | 19.35 $\pm$ 0.20                     | 16.34 $\pm$ 0.14               | 2.66 $\pm$ 0.18   | 0.09 $\pm$ 0.01    |
| 17  | RTP Bacteria DNA Mini kit                        | 93 $\pm$ 1     | 26.13 $\pm$ 0.26                     | 23.26 $\pm$ 0.54               | 3.01 $\pm$ 0.46   | 3.24 $\pm$ 2.41    |
| 18  | smart DNA prep                                   | 65 $\pm$ 14    | 20.79 $\pm$ 0.37                     | 18.02 $\pm$ 0.07               | 0.41 $\pm$ 0.11   | -0.01 $\pm$ 0.01   |
| 19  | Echolution Tissue DNA Micro kit                  | 61 $\pm$ 40    | 21.86 $\pm$ 1.48                     | 16.55 $\pm$ 0.59               | 1.31 $\pm$ 0.07   | 0.24 $\pm$ 0.33    |
| 20  | QIAmp DNA Microbiome kit                         | 27 $\pm$ 1     | 24.03 $\pm$ 0.20                     | 16.32 $\pm$ 0.17               | 2.35 $\pm$ 0.47   | 0.09 $\pm$ 0.01    |

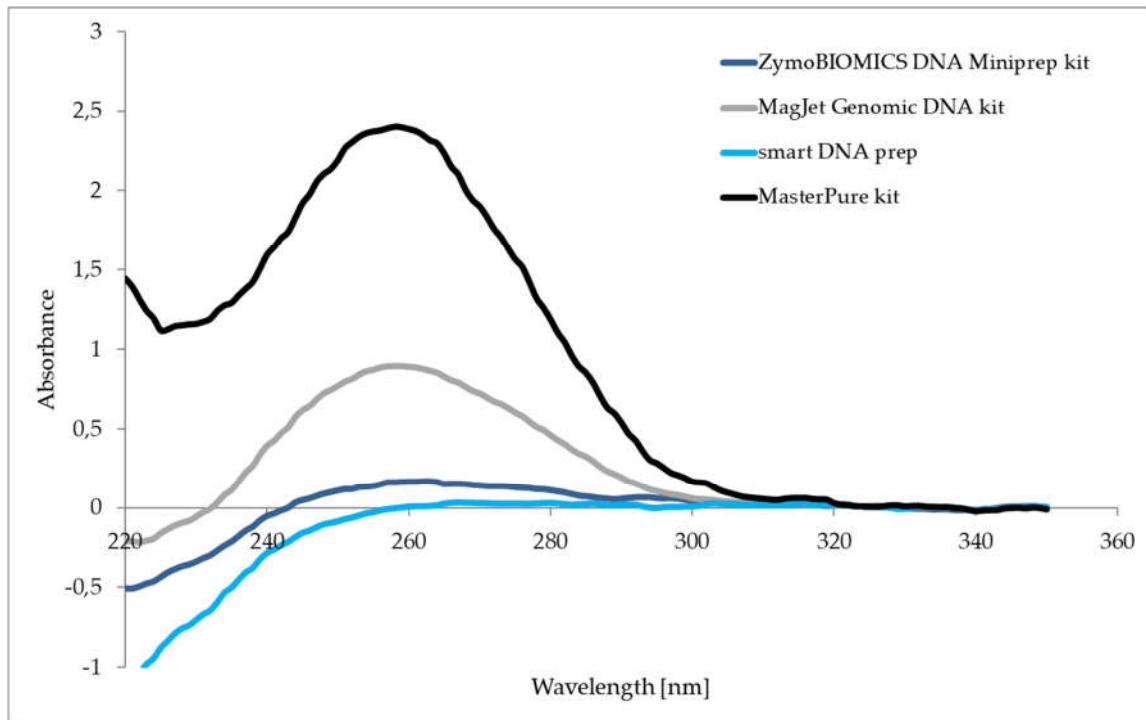

**Figure S1. DNA extraction method affects DNA purity.**

Exemplary spectrophotometric measurements for four DNA extraction kits are shown, with the highest DNA purity achieved with the MasterPure Complete DNA & RNA Purification kit of Lucigen.

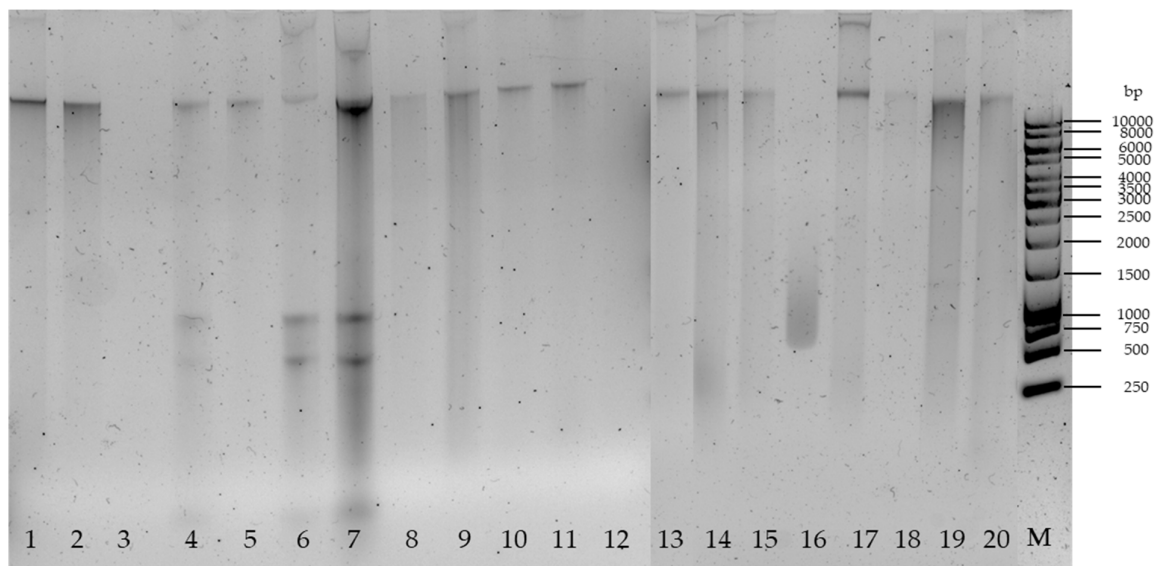

**Figure S2. Visualization of DNA integrity of DNA extracted from *B. anthracis* or *F. tularensis* cells by agarose gel electrophoresis.**

Representative results from gel electrophoresis analysis of 5 µl gDNA from samples containing *B. anthracis* and *F. tularensis* cells extracted with the following commercial kits: 1) NucleoSpin Microbial DNA; 2) DNA Miniprep kit; 3) smart DNA prep; 4) innu PREP DNA Mini kit; 5) nexttec 1-step DNA isolation kit for Bacteria; 6) MagJet Genomic DNA kit; 7) MasterPure Complete DNA & RNA Purification kit; 8) DNeasy PowerSoil kit; 9) In-house protocol; 10) QIAamp UCP Pathogen Mini kit; 11) DNeasy Blood and Tissue kit; 12) QIAamp DNA Microbiome kit; 13) QIAamp Cador pathogen Mini kit; 14) QIAamp DNA Mini kit; 15) GenElute Bacterial Genomic DNA kit; 16) RTP Bacteria DNA Mini kit; 17) Wizard Genomic DNA Purification kit; 18) Echolution Tissue DNA Micro kit; 19) DNeasy Ultra Clean Microbial kit; 20) PureLink Microbiome DNA Purification kit; M) 1 kb DNA ladder marker.

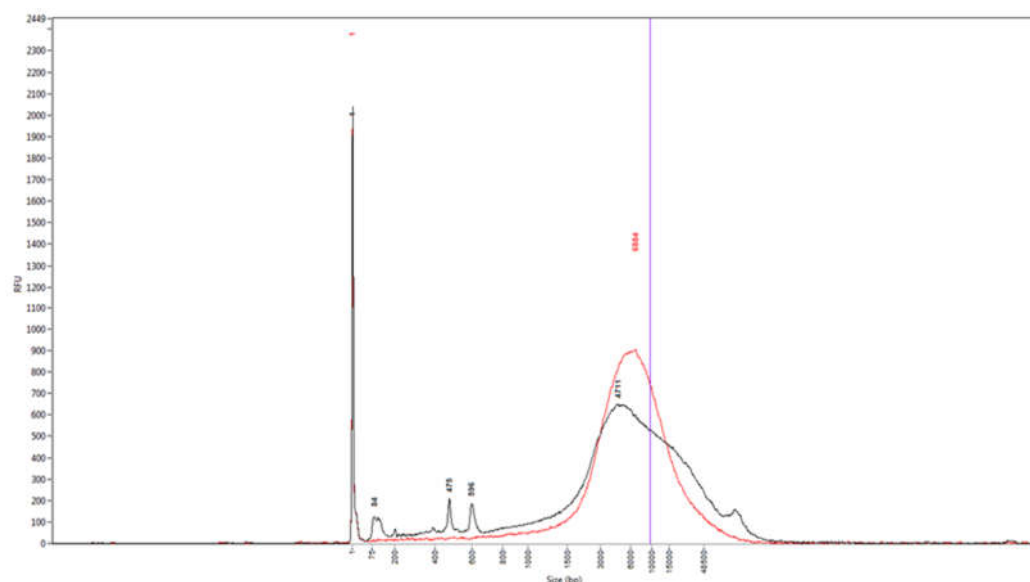

**Figure S3. DNA extracted from *B. anthracis* with the MasterPure kit is suitable for nanopore sequencing.** Exemplary 5200 Fragment Analyzer results of gDNA extracted from *B. anthracis* cells using standard protocol of MasterPure Complete DNA & RNA Purification kit (black) or the QIAamp DNA Mini kit (red). With the MasterPure kit large amounts of high quality, high molecular weight DNA can be obtained.

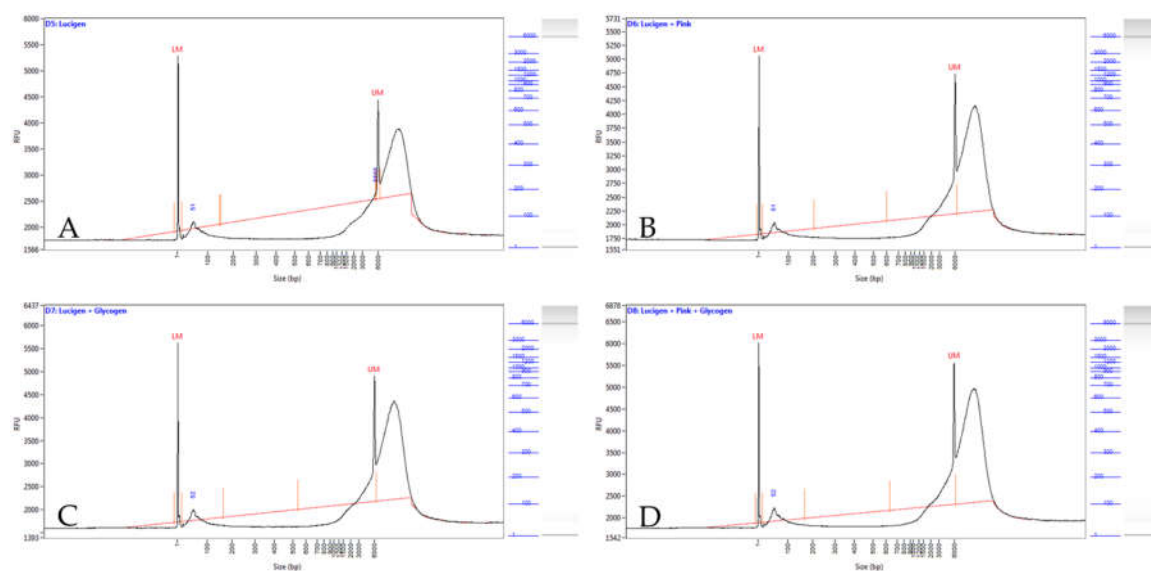

**Figure S4. The addition of glycogen and Roti@PinkDNA gives superior DNA yields.** 5200 Fragment Analyzer results of gDNA extracted from *B. anthracis* cells using standard protocol of MasterPure Complete DNA & RNA Purification kit (A) or with the following modifications: B) Roti@PinkDNA added to the precipitation mixture; C) glycogen added to the precipitation mixture; D) glycogen and Roti@PinkDNA added to the precipitation mixture.

**Table S2. Maximum recovery of genomic DNA of *B. anthracis* and *F. tularensis* is obtained in the presence of glycogen and Roti@PinkDNA.**

Copy number validation by ddPCR: The final DNA concentration of DNA extracted from *B. anthracis* cells was validated with ddPCR. DNA was extracted with the standard protocol of the MasterPure Complete DNA & RNA Purification and in the presence or absence of glycogen and/or Roti@PinkDNA. Maximum and minimum Poisson distribution for the 95% confidence interval generated by QuantaSoft™ is also indicated.

| Sample                                      | DNA concentration<br>[copies/ $\mu$ L] | PoissonConfMax | PoissonConfMin |
|---------------------------------------------|----------------------------------------|----------------|----------------|
| Standard protocol                           | 15,981                                 | 16,280         | 15,660         |
| Standard protocol + Roti@PinkDNA            | 15,659                                 | 15,890         | 15,270         |
| Standard protocol + glycogen                | 14,855                                 | 15,110         | 14,500         |
| Standard protocol + Roti@PinkDNA + glycogen | 21,352                                 | 21,770         | 20,920         |

**Table S3. Detection sensitivity of DNA extraction was improved to  $8.6 \times 10^1$  cells/mL for *B. anthracis* and  $8.6 \times 10^1$  cells/mL for *F. tularensis* by modified MasterPure protocol.**

Average cell number of *B. anthracis* and *F. tularensis* per aliquot for DNA extraction with the MasterPure Complete DNA & RNA Purification kit and mean  $C_t$  values obtained with real-time PCR. All experiments were done at least in triplicate, and the results were reported as mean  $\pm$  standard deviation.

| <i>B. anthracis</i> |                        | <i>F. tularensis</i> |                        |
|---------------------|------------------------|----------------------|------------------------|
| cells/extraction    | $[C_t \text{ values}]$ | cells/extraction     | $[C_t \text{ values}]$ |
| $8.6 \times 10^8$   | 11.69 $\pm$ 0.00       | $5.0 \times 10^8$    | 11.04 $\pm$ 0.09       |
| $8.6 \times 10^7$   | 14.74 $\pm$ 0.07       | $5.0 \times 10^7$    | 13.96 $\pm$ 0.06       |
| $8.6 \times 10^6$   | 18.83 $\pm$ 0.02       | $5.0 \times 10^6$    | 18.42 $\pm$ 0.16       |
| $8.6 \times 10^5$   | 23.20 $\pm$ 0.22       | $5.0 \times 10^5$    | 22.20 $\pm$ 0.11       |
| $8.6 \times 10^4$   | 27.41 $\pm$ 0.34       | $5.0 \times 10^4$    | 25.55 $\pm$ 0.12       |
| $8.6 \times 10^3$   | 31.64 $\pm$ 0.19       | $5.0 \times 10^3$    | 29.23 $\pm$ 0.16       |
| $8.6 \times 10^2$   | 35.06 $\pm$ 0.40       | $5.0 \times 10^2$    | 32.19 $\pm$ 0.47       |
| $8.6 \times 10^1$   | 37.31 $\pm$ 1.40       | $5.0 \times 10^1$    | 36.85 $\pm$ 0.17       |

**Table S4. The improved DNA extraction protocol is highly efficient and robust for DNA overload and PCR inhibitors.**

Two DNA extraction methods, A) the silica-based method (QIAamp DNA Mini kit) and B) the salting-out method (MasterPure Complete DNA & RNA Purification kit) were compared regarding their ability to deal with an overload of starting material. Therefore, 1 mL of sheep blood and 1 mL of an *E. coli* overnight culture (approximately  $10^{10}$  cells) were spiked with  $10^8$  cells of *B. anthracis*. The DNA extracted was eluted or dissolved in 200  $\mu$ L TE buffer, respectively. DNA concentrations were measured with the Qubit Fluorometer using the dsDNA HS assay kit. The amount of *B. anthracis* cells was determined via qPCR. Averaged  $C_t$  values and DNA concentrations (from triplicates) and standard deviations (SD) are calculated.

| Kit | Sheep blood            |                                 | <i>E. coli</i> overnight culture |                                 |
|-----|------------------------|---------------------------------|----------------------------------|---------------------------------|
|     | $[C_t \text{ values}]$ | DNA concentration [ng/ $\mu$ L] | $[C_t \text{ values}]$           | DNA concentration [ng/ $\mu$ L] |
| A   | 29.20 $\pm$ 2.21       | 1.19 $\pm$ 0.13                 | 18.84 $\pm$ 0.13                 | 17.25 $\pm$ 2.04                |
| B   | 21.29 $\pm$ 0.37       | 21.65 $\pm$ 1.38                | 14.60 $\pm$ 0.17                 | 303.00 $\pm$ 51.14              |

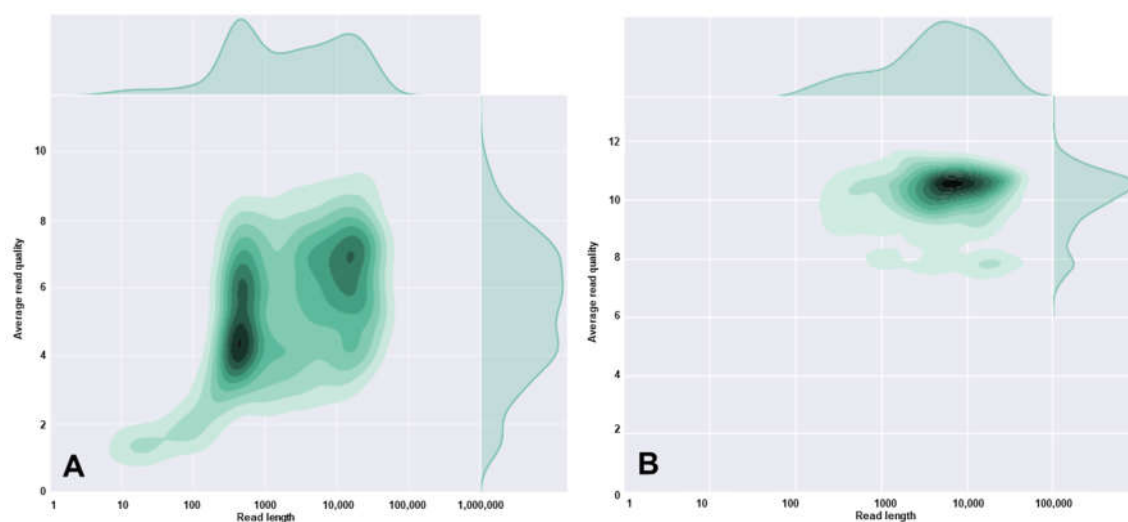

**Figure S5. DNA extraction method impacts the quality of sequencing results.**

Read-length vs read-quality plot for sequencing data obtained from two MinION runs. DNA of *B. anthracis* was isolated with the QIAamp DNA Mini kit (A) and the MasterPure Complete DNA & RNA Purification kit (B). Library preparation was conducted according to the manufacturers' protocol, using the Native Barcoding expansion pack (EXP-NBD104) and the 1D Sequencing kit, with the SQK-LSK109 chemistry. No additional shearing was performed.

**Table S5. Similar DNA concentrations can be retrieved from cell debris and from the lysis supernatants.**

Copy number validation by ddPCR: The final DNA concentration of DNA extracted from *B. anthracis* spores was validated with ddPCR. After bead-beating DNA was extracted from the debris pellet and from lysis supernatant with the MasterPure Complete DNA & RNA Purification kit. Poisson distribution for the 95% confidence interval generated by QuantaSoft™ is also indicated.

| Sample            | Concentration spores [CFU] | DNA concentration [copies/μL] | PoissonConfMax | PoissonConfMin |
|-------------------|----------------------------|-------------------------------|----------------|----------------|
| Cell debris       | 10 <sup>6</sup>            | 2645                          | 2950           | 2340           |
| Lysis supernatant | 10 <sup>6</sup>            | 2630                          | 2930           | 2330           |
| Cell debris       | 10 <sup>5</sup>            | 265                           | 2950           | 2350           |
| Lysis supernatant | 10 <sup>5</sup>            | 278                           | 3100           | 2460           |
